# Supplementary material
Source: PubMed Central journal article supplement (PMC6031403)
Supplement: develop-145-165498-s1.pdf [file develop-145-165498-s1.pdf]

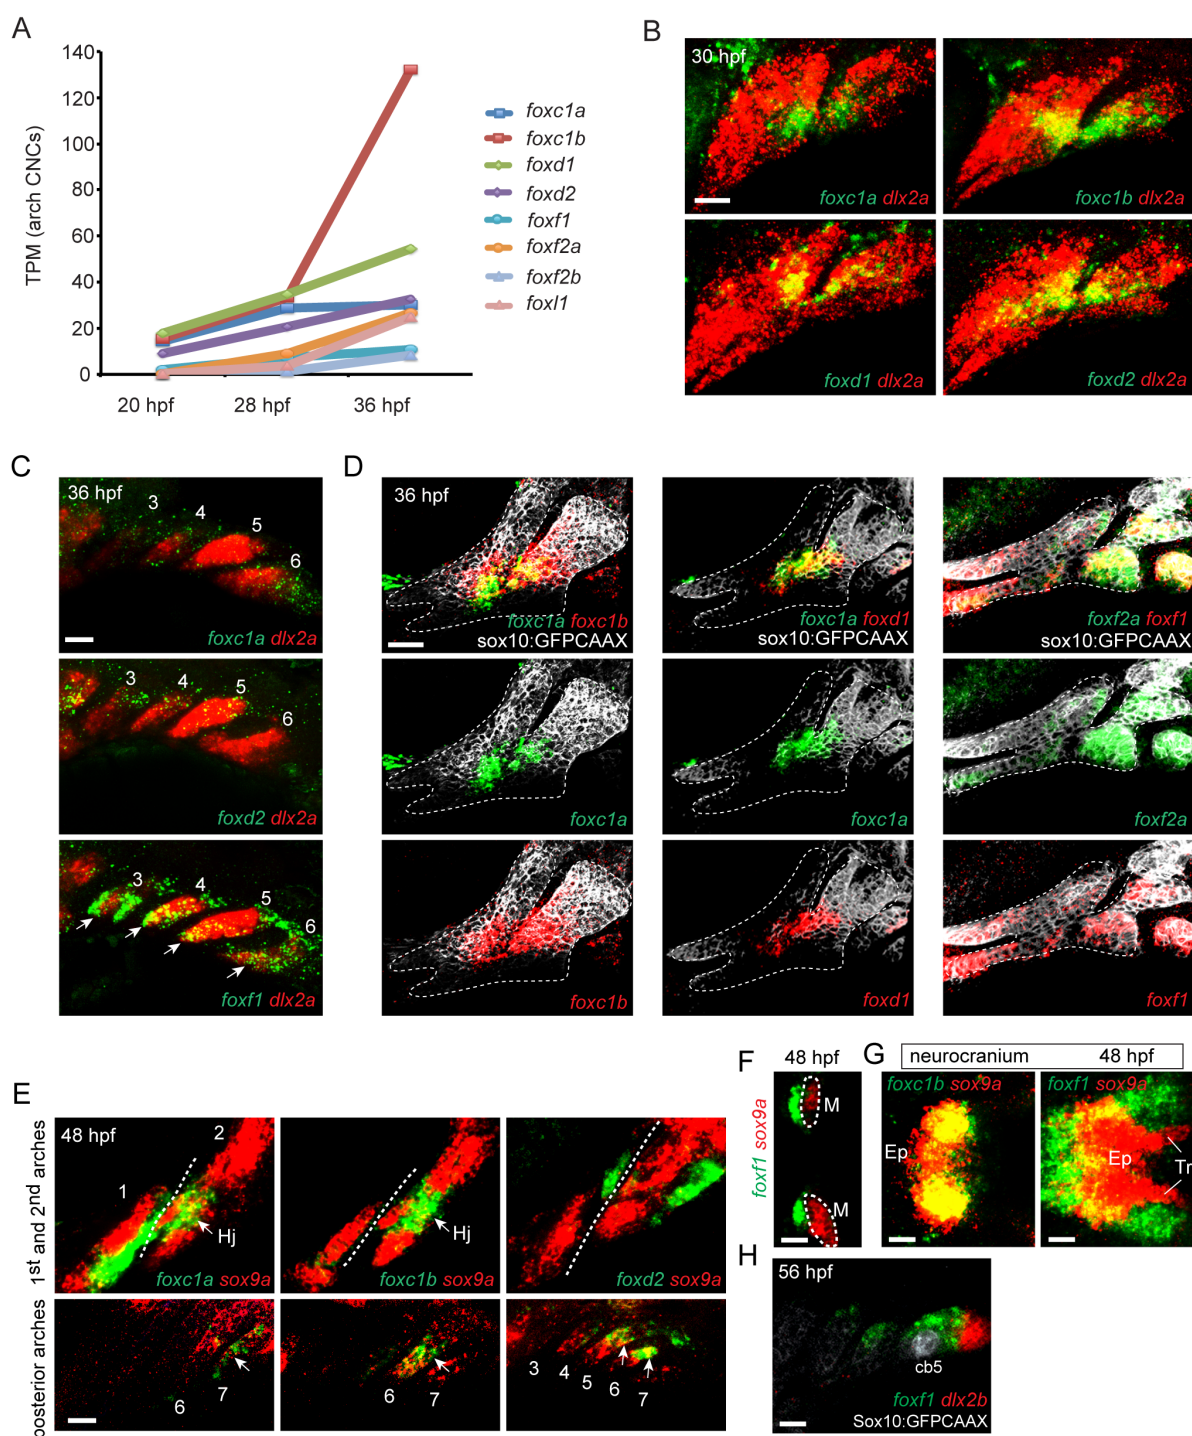

**Figure S1. Arch expression of Fox genes**

(A) Transcripts Per Million Reads (TPM) values for Fox genes in FACS-purified arch CNCs at 20, 28, and 36 hpf.

**(B)** Fluorescent in situ hybridizations at 30 hpf show similar expression of *foxc1a*, *foxc1b*, *foxd1*, and *foxd2* (green) in *dlx2a*+ CNCs (red) of the first two arches.

**(C)** Fluorescent in situ hybridizations at 36 hpf show expression of *foxf1* in the ventral domains (arrows) of the gill-bearing branchial arches (numbered 3-6), but only minimal expression of *foxc1a* and *foxd2*.

**(D)** Double fluorescent in situ hybridizations at 36 hpf show relative expression of *foxc1a* (green) to *foxc1b* (red) and *foxd1* (red), and *foxf1* (red) to *foxf2a* (green), in Sox10:GFPCAAX+ CNCs (white) of the first two arches (dotted lines). *foxc1b* is more broadly expressed than *foxc1a* and *foxd1*. *foxf1* and *foxf2a* are expressed in largely similar domains.

**(E-F)** Fluorescent in situ hybridizations show expression of *foxc1a*, *foxc1b*, *foxd2*, and *foxf1* (green) relative to *sox9a*+ chondrocytes (red) at 48 hpf. By this stage, Fox gene expression is generally excluded from early cartilage, including around the distal tip of Meckel's (M), although expression of *foxc1a* and *foxc1b* is observed in nascent *sox9a*+ chondrocytes of the hyoid joint (Hj, arrows). We also observe expression of *foxc1b* and *foxd2* in intermediate and dorsal domains (arrows), respectively, of the posterior arches, and weak expression of *foxc1a* in the seventh arch (arrow).

**(G)** In the developing neurocranium, *foxc1b* co-localizes with *sox9a*, while *foxf1* is seen in cells surrounding the trabeculae (Tr) and ethmoid plate (Ep).

**(H)** Confocal section shows expression of *foxf1* (green) in the dental mesenchyme adjacent to the *dlx2b*+ dental epithelium (red) and the *sox10*:GFPCAAX+ ceratobranchial cartilage 5 (cb5, labeled in white by anti-GFP antibody). Scale bars = 25  $\mu$ m.

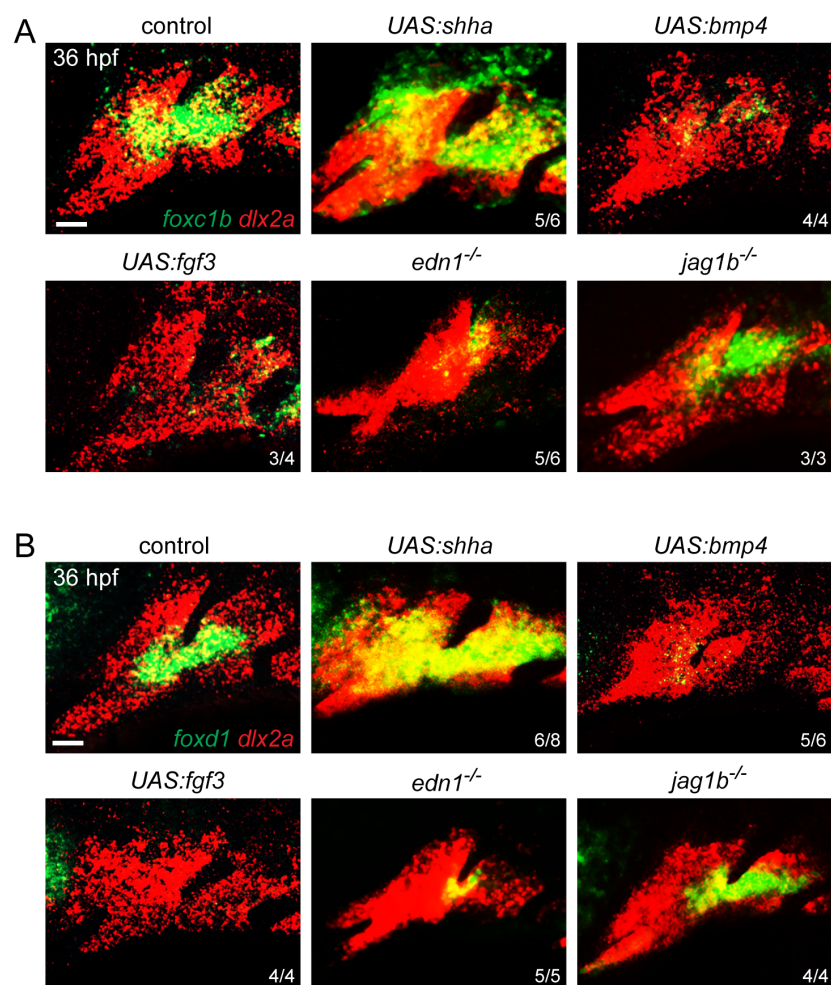

### Figure S2. Regulation of *foxc1b* and *foxd1* arch expression

Expression of *foxc1b* (A) and *foxd1* (B) in green, relative to *dlx2a*<sup>+</sup> CNCs (red) of the first two arches. Similar to *foxc1a* in Figure 1, *foxc1b* and *foxd1* expression is expanded by Shha misexpression, inhibited by Bmp4 and Fgf3 misexpression, and reduced in *edn1* but not *jag1b* mutants. Embryos doubly transgenic for *hsp70l:Gal4* and *UAS:shha*, *UAS:bmp4*, or *UAS:fgf3* were subjected to a heat-shock from 20-24 hpf to induce ligand expression throughout embryos. Numbers indicate proportion of animals showing the displayed patterns. Scale bars = 25  $\mu$ m.

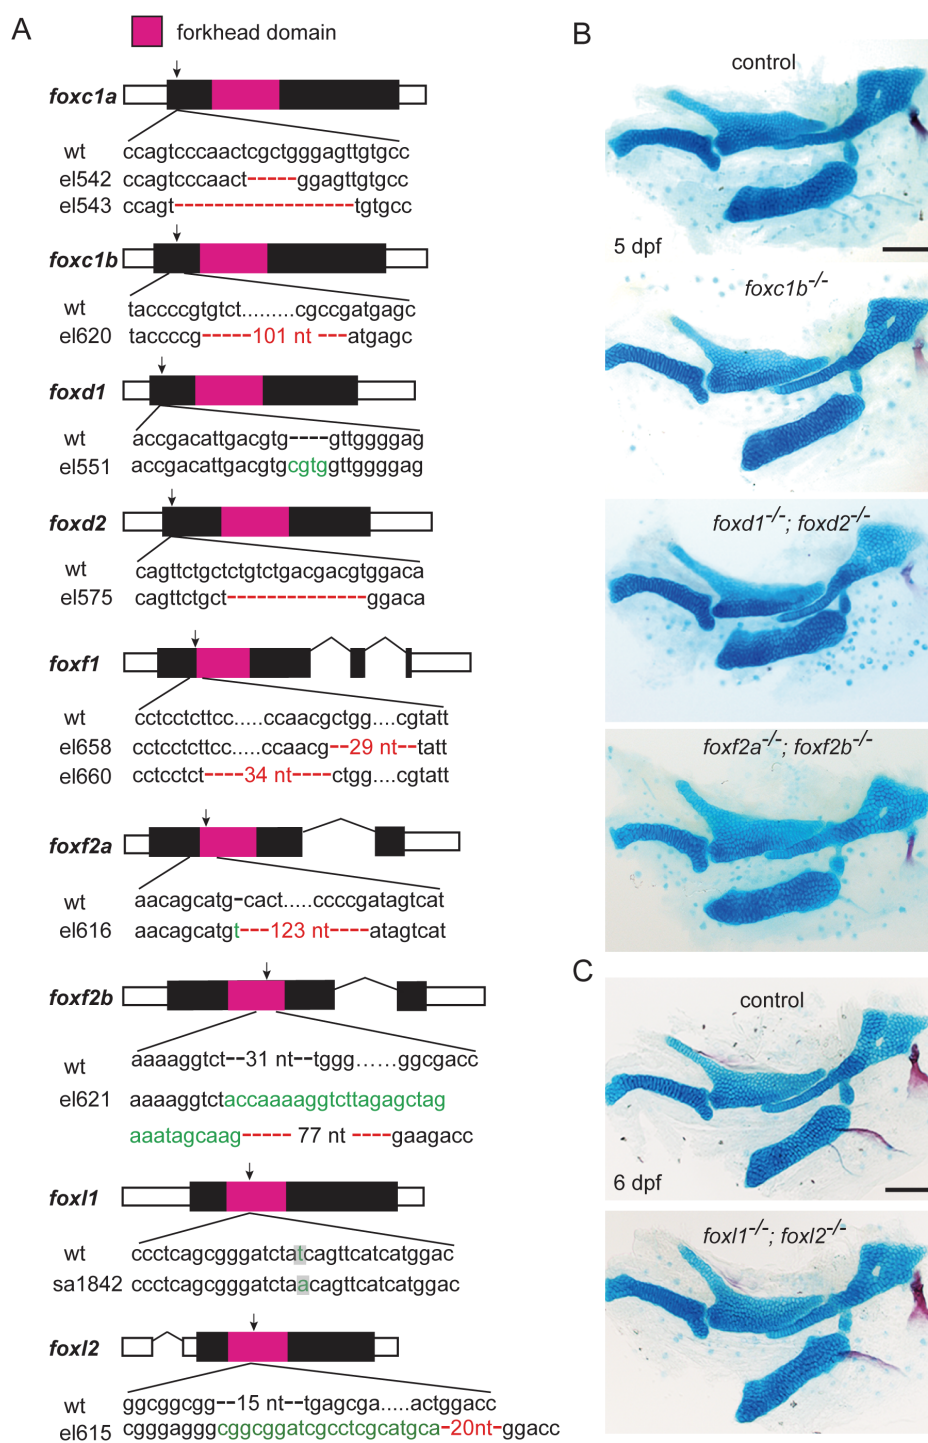

**Figure S3. Fox mutant alleles**

(A) Schematics of Fox alleles generated for this study. The predicted protein products are shown in black with the Forkhead DNA-binding domains in magenta. For the targeted DNA sequences, series of red dashes indicate deletions, and green letters indicate insertions. For the *foxl1*<sup>sa1842</sup> generated by

the Sanger Center, the nonsense mutation (t > a) is indicated in green. Sites where the predicted proteins are truncated by mutations are indicated with arrows.

(B-C) Unilateral dissections of the skeletons of the first two arches stained with Alcian Blue (cartilage) and Alizarin Red (bone) at 5 dpf (B) or 6 dpf (D). No defects were seen in at least 20 larvae examined for each genotype. Scale bars = 25  $\mu$ m.

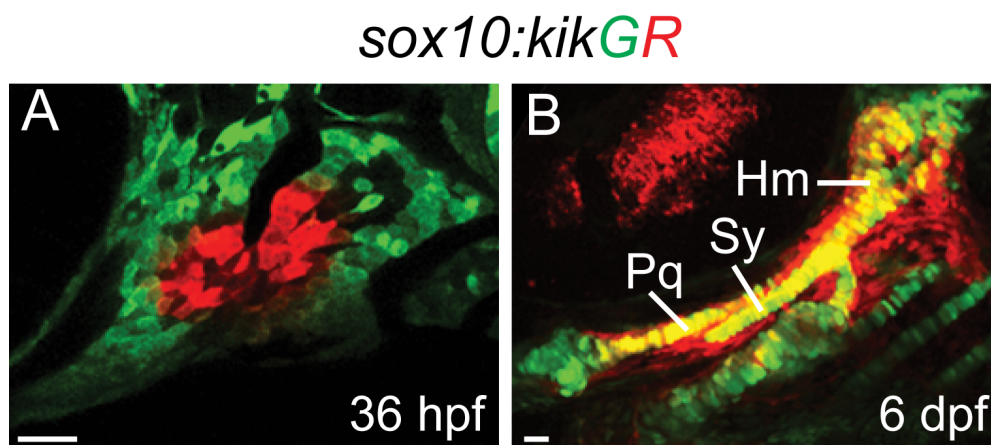

#### Figure S4. Fate mapping of the Fox-C expression domain

Images show the first two arches at 36 hpf (A) and the resultant skeleton at 6 dpf (B). *sox10:kikGR*+ arch CNCs (green) were photoconverted to red fluorescence with UV light using the ROI function on a Zeiss LSM800 confocal microscope. Photoconversion in a similar domain to where *foxc1a* and *foxd1* are expressed resulted in labeling of the palatoquadrate (Pq), symplectic (Sy), and hyosymplectic (Hm) cartilages. Scale bars = 25  $\mu$ m.

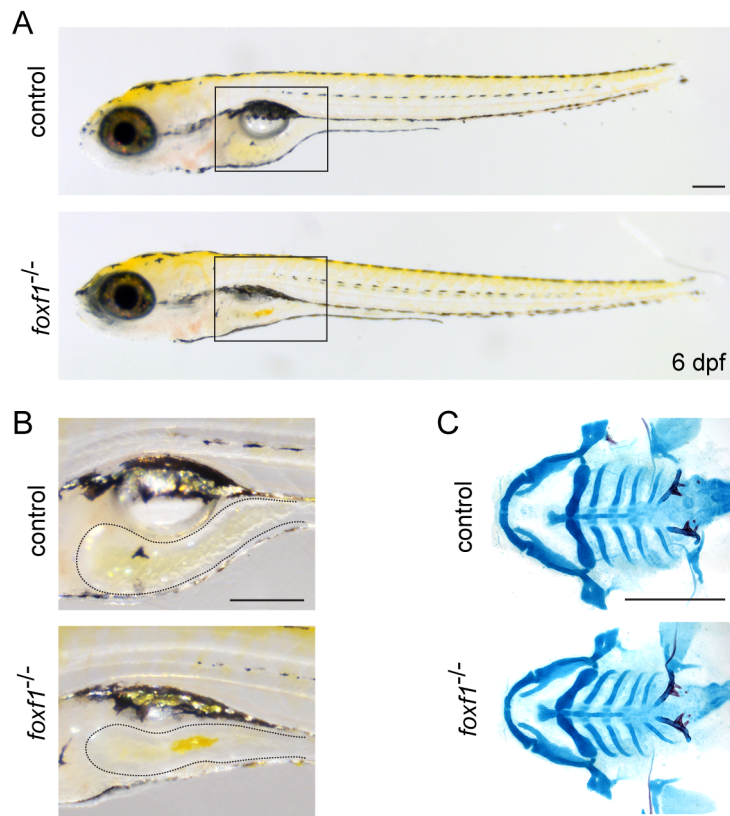

### Figure S5. Phenotype of *foxf1* single mutants

(A) Brightfield images show morphology of control and *foxf1* single mutants in lateral view at 6 dpf. Swim bladders do not properly inflate in all *foxf1* mutants.

(B) Enlarged images of the boxed regions show reduced intestine (dotted areas) in *foxf1* mutants compared to controls.

(C) Ventral views of dissected facial skeletons stained by Alcian Blue (cartilage) and Alizarin Red (bones and teeth). No defects are observed in *foxf1* mutants. Scale bars = 100 μm.

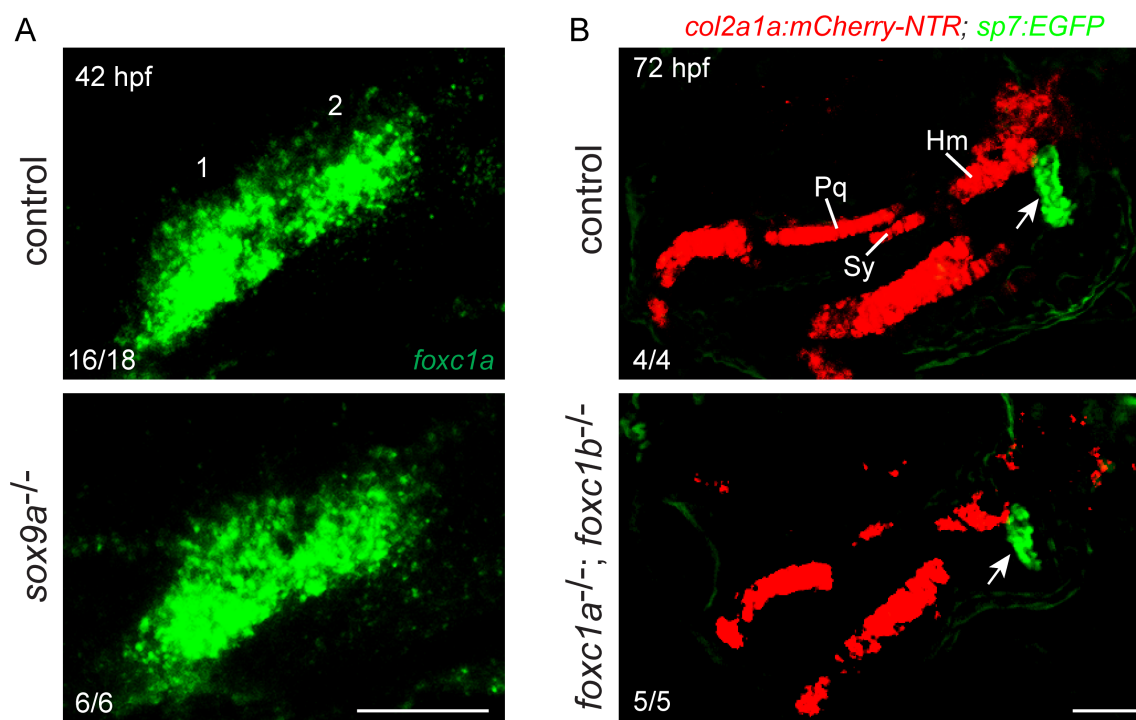

**Figure S6. Expression of *foxc1a* in *sox9a* mutants and chondrocyte defects in Fox-C mutants**

(A) Expression of *foxc1a* in the first two arches is unchanged in *sox9a* mutants at 42hpf.

(B) Confocal imaging of chondrocytes labeled by *col2a1:mCherry-NTR* (red) and osteoblasts labeled by *sp7:GFP* (green) at 72 hpf. In *foxc1a*; *foxc1b* mutants, *col2a1:mCherry-NTR* expression is weaker and/or reduced in the palatoquadrate (Pq), symplectic (Sy), and hyosymplectic (Hm) domains. *sp7:GFP*<sup>+</sup> osteoblasts of the developing opercular bone (Op, arrows) are less affected. Numbers indicate proportion of animals showing the displayed patterns. Scale bars = 100 μm.

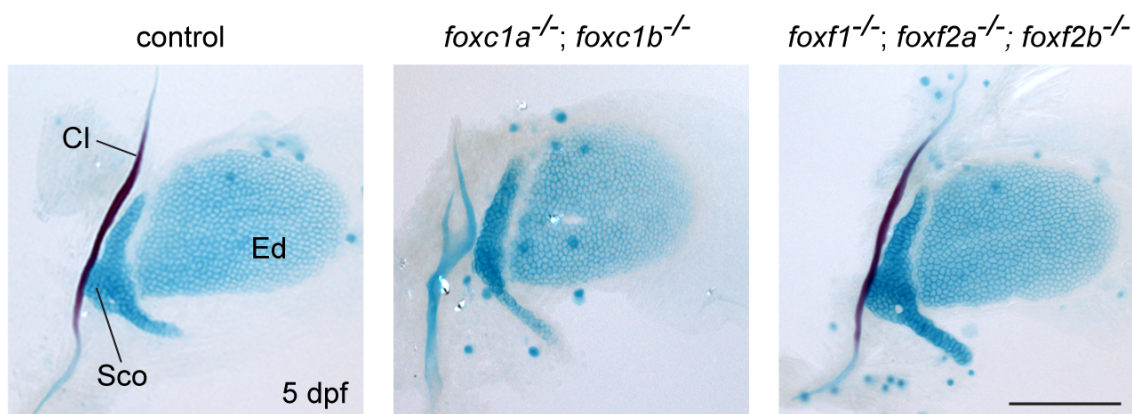

### Figure S7. Normal pectoral fins in Fox-C and Fox-F mutants

Images show pectoral fin skeletons stained with Alcian Blue (cartilage) and Alizarin Red (bone) at 5 dpf. No defects were seen in either *foxc1a*; *foxc1b* or *foxf1*; *foxf2a*; *foxf2b* mutants. The lack of mineralization of the Cl bone in *foxc1a*; *foxc1b* mutants is likely an indirect consequence of cardiac edema. Cl, cleithrum; Ed, endoskeletal disc; Sco, scapulocoracoid. Scale bar = 100  $\mu$ m.



**Table S1. TALEN/CRISPR target sequences and genotyping conditions**

| Gene          | TALEN/CRISPR target sequences                    | Mutation strategy | Mutation type                                                                                                                  | Genotyping primers (5'-3')    |                              | wt product size (bp) | Restriction enzyme |
|---------------|--------------------------------------------------|-------------------|--------------------------------------------------------------------------------------------------------------------------------|-------------------------------|------------------------------|----------------------|--------------------|
|               |                                                  |                   |                                                                                                                                | Forward                       | Reverse                      |                      |                    |
| <i>foxc1a</i> | L:ATTCCGTCTCC<br>AGTC<br>R:GCTGATGTAC<br>GGCA    | TALEN             | e1542: 5-bp deletion induces frameshift after aa 12 (of 476)<br>e1543: 17-bp deletion induces frameshift after aa 10 (of 476)  | GCATTTCAA<br>GCAGGATTG<br>TG  | CGCGTGAGA<br>GTACATGGT<br>CA | 155                  | BseY1              |
| <i>foxc1b</i> | GGCGTTGTGCCT<br>TATATCCC                         | CRISPR            | e1620: 101-bp deletion induces frameshift after aa 7 (of 433)                                                                  | ACCGAAGAA<br>AGGGGTACG<br>AT  | TGTCGGATG<br>AGTTCTGGA<br>TG | 472                  | –                  |
| <i>foxd1</i>  | L:GCTCTCGGAG<br>GAGACC<br>R:CACCATCATC<br>TCCCTC | TALEN             | e1551: 4-bp insertion induces frameshift after aa 12 (of 343)                                                                  | AAACCCGAG<br>AGAGCCATG<br>A   | ATCTCCCTCC<br>CCAACCACG<br>T | 93                   | BmgB1              |
| <i>foxd2</i>  | L:CGGACAGTTC<br>TGCTCT<br>R:CGGACAGTTC<br>TGCTCT | TALEN             | e1575: 14-bp deletion induces frameshift after aa 12 (of 369)                                                                  | ACGGAACGT<br>GAGAGAGGA<br>AG  | CGCGTTCTG<br>GGATAGATT<br>GT | 198                  | Hpy166II           |
| <i>foxf1</i>  | GGGATATAAGG<br>CACAACGCC                         | CRISPR            | e1658: 29-bp deletion induces frameshift after aa 45 (of 380)<br>e1660: 34-bp deletion induces frameshift after aa 33 (of 380) | GCGCAGTCC<br>GTTTCTAATG<br>A  | TGGATGGCC<br>ATGACAATA<br>AG | 281                  | –                  |
| <i>foxf2a</i> | GGCATCCAACA<br>GCATGCACT                         | CRISPR            | e1616: 122-bp deletion induces frameshift after aa 25 (of 383)                                                                 | TCCAGCATTT<br>GCGATGACC<br>A  | GGGCAGCTT<br>GATGAAACA<br>CT | 566                  | –                  |
| <i>foxf2b</i> | GGTCTTGGGCG<br>ACCGGGTAA                         | CRISPR            | e1621: 46-bp deletion induces frameshift after aa 176 (of 429)                                                                 | TACAAACAC<br>GCTTCCC GTT<br>T | CCGGTAGGC<br>GATTGATAG<br>TC | 304                  | –                  |
| <i>foxl1</i>  | –                                                | TILLING           | sa1842: premature stop codon is formed at aa 79 (of 363)                                                                       | CAAAAACCC<br>CCGTACAGC<br>TA  | GAGAGGTTA<br>TGGCGGATT<br>GA | 164                  | HpyCH4III          |
| <i>foxl2</i>  | GGAGGGCGGCG<br>GTGAGCGAA                         | CRISPR            | e1615: 5-bp deletion induces frameshift after aa 112 (of 306)                                                                  | CATCCGACA<br>CAACCTGTC<br>AC  | GTGGAGGCC<br>TAAACGGTC<br>TT | 315                  | HphI               |

**Table S2. In situ probes**

| Gene          | Forward primer (5'-3') | Reverse primer (5'-3') | Enzyme for linearization | RNA polymerase |
|---------------|------------------------|------------------------|--------------------------|----------------|
| <i>foxc1a</i> | TCAGCGTGGACAACATCATG   | AAATACTGGTTTGGTCAAAA   | EcoRI                    | T7             |
| <i>foxc1b</i> | GTTCATCATGGAGCGCTTTC   | CGAGATAGAGGAGGCGTTTG   | EcoRI                    | T7             |
| <i>foxd2</i>  | AACTCCATCCGTCACAACCT   | AACGGACTGCTGCACTTCT    | EcoRI                    | T7             |
| <i>foxf2b</i> | GGCTGGAAGAACTCTGTTCG   | AGTCCTTCCGTTCTCCGACT   | EcoRI                    | T7             |
| <i>foxl1</i>  | TATGTGTACGGTGGCGAAGT   | GTGTCACTCTTTACGGGCAC   | EcoRI                    | T7             |
| <i>dlx2b</i>  | GGAACGTATGGAGCCAGCTC   | TCAAAAAGGCTACCCGTTTG   | NotI                     | SP6            |
| <i>matn4</i>  | CTTCTTCTGTCGCTGCAATG   | CCTCACTGCTGCTGTGTGTT   | NotI                     | SP6            |

**Table S3. Primers used for transgenic constructs.**

| Name                | 5'-3'                                                  |
|---------------------|--------------------------------------------------------|
| <i>fgf3</i> -B1-F   | GGGGACAAGTTTGTACAAAAAAGCAGGCTATGGTTATAATTCTGCTCTT      |
| <i>fgf3</i> -B2-R   | GGGGACCACTTTGTACAAGAAAGCTGGGTTTAAATGTCAGCCCTTCTGT      |
| <i>foxc1a</i> -B1-F | GGGGACAAGTTTGTACAAAAAAGCAGGCTCCACCATGCAGGCGCGCTATTCCGT |
| <i>foxc1a</i> -B2-R | GGGGACCACTTTGTACAAGAAAGCTGGGTTTCAAATTTGCTGCAGTCAT      |
| <i>foxf1</i> -B1-F  | GGGGACAAGTTTGTACAAAAAAGCAGGCTCCACCATGACGGCTGAAGTGCAGCA |
| <i>foxf1</i> -B2-R  | GGGGACCACTTTGTACAAGAAAGCTGGGTTTACATCACACAAGGTTTGA      |
